## Title page

### **Predictors of COVID-19 vaccination uptake and reasons for decline of vaccination: a systematic review**

Running title: Predictors of COVID-19 vaccination uptake

Petros Galanis<sup>a</sup>, Irene Vraka<sup>b</sup>, Olga Siskou<sup>c</sup>, Olympia Konstantakopoulou<sup>c</sup>, Aglaia Katsiroumpa<sup>a</sup>, Daphne Kaitelidou<sup>c</sup>

<sup>a</sup> Clinical Epidemiology Laboratory, Faculty of Nursing, National and Kapodistrian University of Athens, Athens, Greece

<sup>b</sup> Department of Radiology, P & A Kyriakou Children's Hospital, Athens, Greece

<sup>c</sup> Center for Health Services Management and Evaluation, Faculty of Nursing, National and Kapodistrian University of Athens, Athens, Greece

**Corresponding author:** Petros Galanis, Assistant Professor, Clinical Epidemiology Laboratory, Faculty of Nursing, National and Kapodistrian University of Athens, 123 Papadiamantopoulou street, GR-11527, Athens, Greece, e-mail: [pegalan@nurs.uoa.gr](mailto:pegalan@nurs.uoa.gr), <https://orcid.org/0000-0002-1308-5782>

**Word count:** 3370

**Conflicts of interest:** none

**Funding:** None

**Declarations of interest:** None

#### **Author contributions**

P.G and I.V. were responsible for the conception and design of the study. P.G, I.V., O.S., O.K., A.K., and D.K. were responsible for the acquisition, analysis and interpretation of data. All the authors drafted the article or revised it critically for important intellectual content, and provided final approval of the version to be submitted.

## **Abstract**

**Background:** Various COVID-19 vaccines with proven safety and effectiveness are available now but vaccine hesitancy remains a public threat. COVID-19 vaccines uptake appears to have an essential role in the successful control of the COVID-19 pandemic.

**Objective:** To examine predictors of COVID-19 vaccination uptake and reasons for decline of vaccination.

**Methods:** We followed the Preferred Reporting Items for Systematic Reviews and Meta-Analysis guidelines for this systematic review. We searched Medline, PubMed, Web of Science, Scopus, ProQuest, CINAHL, and a pre-print service (medRxiv) from inception to July 12, 2021. We used the following key-words: vaccin\*, COVID-19, and uptake. We included all types of studies (quantitative, qualitative, and mixed methods) reporting COVID-19 vaccination uptake. The review protocol was registered with PROSPERO (CRD42021267460).

**Results:** Twelve studies met the inclusion and exclusion criteria. COVID-19 vaccination uptake ranged from 28.6% to 98% in the general population, while among healthcare workers ranged from 33.3% to 94.5%, and among patients ranged from 36% to 80%. The main predictors of COVID-19 vaccination uptake were male gender, white race, older age, higher socioeconomic status, higher self-perceived COVID-19 vulnerability, increased information about COVID-19 vaccines, and chronic illness. The most important reasons for decline of vaccination were concerns about the safety and effectiveness of vaccines, illness, medication, pregnancy, fertility, breastfeeding, religious reasons, ethical reasons, previous COVID-19 diagnosis, self-estimation that COVID-19 is not a severe disease, and limited knowledge about the vaccines.

**Conclusions:** Several factors affect COVID-19 vaccination uptake, while various reasons affect people's decision to refuse to take a COVID-19 vaccine. These findings are essential to further enhance our understanding of COVID-19 vaccination uptake and design specific interventions. Given the high prevalence of COVID-19 vaccine hesitancy, our findings have major implications for the delivery of COVID-19

vaccination programmes in the public with special attention to people who are undecided or unlikely to take a COVID-19 vaccine.

**Keywords:** COVID-19, vaccination, uptake, predictors, SARS-CoV-2, acceptance

## Background

From December 2020, several COVID-19 vaccines with proven efficacy and safety are being used worldwide (Baden et al., 2021; Logunov et al., 2021; Polack et al., 2020; Wu et al., 2021). Early real-world data have confirmed the effectiveness of COVID-19 vaccines against the severe acute respiratory syndrome coronavirus 2 (SARS-CoV-2) by reducing SARS-CoV-2 infection, COVID-19 cases, hospitalizations, unfavorable outcomes, and deaths among vaccinated individuals (Amit et al., 2021; Dagan et al., 2021; Haas et al., 2021; Hall et al., 2021; Vasileiou et al., 2021). Universal vaccination against SARS-CoV-2 is essential to safely achieve herd immunity and contain the COVID-19 pandemic (Khalife & VanGennep, 2021; Lacsá & Cordero, 2021; MacIntyre et al., 2021).

Willingness of the general population to accept COVID-19 vaccination is the first step to achieve a high rate of COVID-19 vaccination uptake and control the COVID-19 pandemic. However, vaccine hesitancy is one of the main obstacles to control the COVID-19 pandemic since some individuals refuse to take a COVID-19 vaccine (Jaca et al., 2021; Wiysonge et al., 2021). COVID-19 vaccination intention in the general population ranges from 27.7% to 97%, while lower rates are reported in Africa, Middle East, Russia, and several European countries (Al-Amer et al., 2021; Sallam, 2021). Similarly, a wide range of intention to accept COVID-19 vaccination (from 23.4% to 81.5%) is reported among healthcare workers with an overall proportion of 55.9% (Galanis et al., 2020; M. Li et al., 2021). Moreover, vaccine hesitancy is higher among healthcare workers and particularly among nurses than the general population due to concerns about the safety and effectiveness of vaccines (Al-Amer et al., 2021).

Several factors are shown to be associated with vaccine hesitancy, such as female gender, younger age, healthcare profession, low confidence in the government, concerns for safety, efficacy and effectiveness of COVID-19 vaccines, low levels of knowledge, negative information about COVID-19 vaccines, paranoid or conspiracy beliefs (Al-Amer et al., 2021; Butter et al., 2021; Galanis et al., 2020; M. Li et al., 2021; Murphy et al., 2021). On the other hand, morbidity, stronger vaccine confidence, seasonal influenza vaccination, positive attitude towards COVID-19 vaccines, fear against COVID-19, and high self-perceived risk of COVID-19 are

positive predictive factors to accept a vaccine against COVID-19 (Galanis et al., 2020; M. Li et al., 2021).

Robust vaccination programs against SARS-COV-2 have been established throughout the world. Early studies have already investigated predictors of COVID-19 vaccination uptake but to date, no systematic review on this issue is published. Thus, the current systematic review aimed to examine predictors of COVID-19 vaccination uptake and reasons for decline of vaccination.

## **Methods**

### **Data sources and strategy**

A systematic review was conducted according to the Preferred Reporting Items for Systematic Reviews and Meta-Analysis (PRISMA) guidelines (Moher et al., 2009). We searched Medline, PubMed, Web of Science, Scopus, ProQuest, CINAHL, and a pre-print service (medRxiv) from inception to July 12, 2021. We used the following strategy in all fields: ((vaccin\*) AND (COVID-19)) AND (uptake). The review protocol was registered with PROSPERO (registration number: CRD42021267460).

### **Selection and eligibility criteria**

After duplicates removal, we screened titles, abstracts, and full texts. Also, we examined reference lists of all relevant articles. Two independent authors performed study selection and a third, senior author resolved the differences. We included all types of studies (quantitative, qualitative, and mixed methods) reporting COVID-19 vaccination uptake. Also, we included studies that examine predictors of COVID-19 vaccination uptake and reasons for decline of vaccination. Studies published in English were eligible to be included. We excluded reviews, protocols, case reports, letters to the Editor, and editorials.

### **Data extraction and quality assessment**

Two reviewers independently extracted the following data from the studies: authors, country, data collection time, sample size, age, population, study design, sampling method, response rate, percentage of COVID-19 vaccination uptake, predictors of COVID-19 vaccination uptake, reasons for decline of COVID-19 vaccination, and type of publication (journal or pre-print service). We appraised each study's quality using the Joanna Briggs Institute critical appraisal tool for cross-sectional studies (Santos et al., 2018).

## **Results**

### **Identification and selection of studies**

As shown in Figure 1, our initial search yielded 1682 records after duplicates removal. After following the inclusion and exclusion criteria, 12 articles were identified.

### **Characteristics of the studies**

Main characteristics of the 12 studies included in this systematic review are presented in Table 1. Four studies were conducted in the USA (Gharpure et al., 2021; McCabe et al., 2021; Pacella-LaBarbara et al., 2021; Schradling et al., 2021), four studies in United Kingdom (Gibbon et al., 2021; Glampson et al., 2021; Martin et al., 2021; The OpenSAFELY Collaborative et al., 2021), one study in China (Xu et al., 2021), one study in Kingdom of Saudi Arabia (Barry et al., 2021), and one study in Poland (Malesza & Bozym, 2021). Also, one study included participants from the USA and United Kingdom (L. Nguyen et al., 2021). Data collection time among studies ranged from December 2020 (Barry et al., 2021; Gharpure et al., 2021) to May 2021 (McCabe et al., 2021), while the response rate ranged from 78.3% (Malesza & Bozym, 2021) to 100% (Gibbon et al., 2021). All studies were cross-sectional and a convenience sampling method was used. Sample size ranged from 85 (Gibbon et al., 2021) to 20,852,692 participants (The OpenSAFELY Collaborative et al., 2021). Five studies were published in journals (Gharpure et al., 2021; Gibbon et al., 2021; Pacella-LaBarbara et al., 2021; Schradling et al., 2021; Xu et al., 2021) and seven

studies in pre-print services (Barry et al., 2021; Glampson et al., 2021; Malesza & Bozym, 2021; Martin et al., 2021; McCabe et al., 2021; L. Nguyen et al., 2021; The OpenSAFELY Collaborative et al., 2021).

Study population included general population (Glampson et al., 2021; McCabe et al., 2021; L. Nguyen et al., 2021), healthcare workers (Barry et al., 2021; Martin et al., 2021; Pacella-LaBarbara et al., 2021; Schradling et al., 2021; Xu et al., 2021), patients (Gibbon et al., 2021; The OpenSAFELY Collaborative et al., 2021), elderly (Malesza & Bozym, 2021), and residents and staff members of long-term care facilities (Gharpure et al., 2021). COVID-19 vaccination uptake ranged from 28.6% (L. Nguyen et al., 2021) to 98% in the general population (McCabe et al., 2021), among healthcare workers ranged from 33.3% (Barry et al., 2021) to 94.5% (Schradling et al., 2021), and among patients ranged from 36% (The OpenSAFELY Collaborative et al., 2021) to 80% (Gibbon et al., 2021). Also, COVID-19 vaccination uptake was 62.7% in a sample of elderly (Malesza & Bozym, 2021), and 77.8% among residents of long-term care facilities (Gharpure et al., 2021).

Eight studies did not report data regarding response rate (Barry et al., 2021; Gharpure et al., 2021; Glampson et al., 2021; Martin et al., 2021; McCabe et al., 2021; L. Nguyen et al., 2021; The OpenSAFELY Collaborative et al., 2021; Xu et al., 2021), two regarding age (Gharpure et al., 2021; Glampson et al., 2021), one regarding data collection time (Gibbon et al., 2021), and one regarding sample size (Gharpure et al., 2021).

### **Quality assessment**

Quality assessment of cross-sectional studies included in this review is shown in Table 3. Quality was good in seven studies (Barry et al., 2021; Malesza & Bozym, 2021; Martin et al., 2021; McCabe et al., 2021; L. Nguyen et al., 2021; Pacella-LaBarbara et al., 2021; Xu et al., 2021), moderate in four studies (Gharpure et al., 2021; Glampson et al., 2021; Schradling et al., 2021; The OpenSAFELY Collaborative et al., 2021), and poor in one study (Gibbon et al., 2021). Five studies did not identify confounding factors (Gharpure et al., 2021; Gibbon et al., 2021; Glampson et al., 2021; Schradling et al., 2021; The OpenSAFELY Collaborative et al., 2021), three studies did not describe in detail the study subjects and the setting (Gharpure et al., 2021; Gibbon et al., 2021; Glampson et al., 2021), two studies did not measure the

exposure in a valid and reliable way (Gharpure et al., 2021; Gibbon et al., 2021), and two studies did not use the appropriate statistical analysis (Gibbon et al., 2021; Schrading et al., 2021) (Table 2).

### **Predictors of COVID-19 vaccination uptake and reasons for decline of vaccination**

Nine studies investigated predictors of COVID-19 vaccination uptake (Barry et al., 2021; Gibbon et al., 2021; Glampson et al., 2021; Malesza & Bozym, 2021; Martin et al., 2021; McCabe et al., 2021; L. Nguyen et al., 2021; Pacella-LaBarbara et al., 2021; Schrading et al., 2021), while five studies searched for reasons for decline of COVID-19 vaccination (Gibbon et al., 2021; Malesza & Bozym, 2021; L. Nguyen et al., 2021; Schrading et al., 2021; Xu et al., 2021) (Table 3).

We found that several factors affect COVID-19 vaccination uptake. In particular, seven studies found that white individuals had the highest rate of vaccination uptake, while black individuals have the lowest rate (Gibbon et al., 2021; Glampson et al., 2021; Martin et al., 2021; McCabe et al., 2021; L. Nguyen et al., 2021; Schrading et al., 2021; Xu et al., 2021). Also, Barry et al. (2021) found that native-born participants were vaccinated for COVID-19 more often than immigrants. Gender and age were predictors of COVID-19 vaccination uptake since four studies (Barry et al., 2021; Martin et al., 2021; Pacella-LaBarbara et al., 2021; Schrading et al., 2021) found that uptake was higher among males and three studies (Barry et al., 2021; Martin et al., 2021; McCabe et al., 2021) found that uptake was higher among older participants. Higher education level (Schrading et al., 2021), higher income (McCabe et al., 2021), and higher rank occupation (Malesza & Bozym, 2021) were related with higher levels of COVID-19 vaccination uptake. COVID-19 vaccination uptake was more likely in physicians (Schrading et al., 2021), in allied health professionals and administrative/executive staff (Martin et al., 2021), and in healthcare workers in university hospitals and intensive care units (Barry et al., 2021). According to McCabe et al. (2021), general population was vaccinated more often than healthcare workers. Participants without a history of COVID-19 infection (Martin et al., 2021; Pacella-LaBarbara et al., 2021), participants with higher self-perceived COVID-19 vulnerability (Pacella-LaBarbara et al., 2021), and participants that were more



informed about COVID-19 vaccines (Malesza & Bozym, 2021) were more likely to be vaccinated. Malesza & Bozym (2021) found that vaccination uptake was higher among participants living with others and those with a chronic illness.

The most important reasons for decline of vaccination were concerns about the safety and effectiveness of vaccines, illness, medication, pregnancy, fertility, breastfeeding, religious reasons, ethical reasons, previous COVID-19 diagnosis, self-estimation that COVID-19 is not a severe disease, bad experiences of vaccines among family members/friends, and limited knowledge about the vaccines (Gibbon et al., 2021; Malesza & Bozym, 2021; L. Nguyen et al., 2021; Schrading et al., 2021; Xu et al., 2021).

## **Discussion**

To our knowledge, this is the first systematic review that examines predictors of COVID-19 vaccination uptake and reasons for decline of vaccination. Twelve papers met our inclusion and exclusion criteria and COVID-19 vaccination uptake ranged from 28.6% to 98% in the general population, while among healthcare workers ranged from 33.3% to 94.5%.

According to our systematic review, COVID-19 vaccination uptake was higher among white individuals than black individuals. This result echoes the findings of research which shows a higher rate of COVID-19 vaccine hesitancy in ethnic minorities, particularly in Black and Asian groups (Funk & Tyson, 2021; Hamel et al., 2021; K. H. Nguyen et al., 2021; Ruiz & Bell, 2021). Lack of trust in the governments, lower self-perception of the risk of COVID-19, concerns about the safety of vaccines, religious factors, fear of adverse reactions, and lower socioeconomic status considered to be barriers to vaccine uptake in ethnic minorities (Forster et al., 2017; Gamble, 1997; Mills et al., 2020). Moreover, health-protective behaviors during the COVID-19 pandemic such as mask usage is shaped by an insensitivity to deaths among Black and Latin Americans (Franz et al., 2021). In particular, mask wearing increased when death rates among White Americans relative to death rates among Black and Latin Americans increased. Ethnic minority groups are high-risk groups for infection with SARS-CoV-2 and adverse outcomes from

COVID-19 and further consideration should be given to how the COVID-19 vaccination uptake can be improved in people from ethnic minorities (Martin, Jenkins, et al., 2020; Martin, Patel, et al., 2020; Sze et al., 2020; Voysey et al., 2021).

We found that male gender and older age were related with increased COVID-19 vaccination uptake. This finding is plausible since it is well known that older age is a significant predictor of COVID-19 mortality (Mehraeen et al., 2020; Sepandi et al., 2020; Yanez et al., 2020). Also, males are generally less likely to report COVID-19 vaccine hesitancy and more likely to accept a COVID-19 vaccine than females (Dror et al., 2020; Gagneux-Brunon et al., 2021; Khubchandani et al., 2021; Lazarus et al., 2021; Malik et al., 2020). Additionally, male patients require more often intensive care unit admission and show higher mortality compare to females (Bienvenu et al., 2020; Peckham et al., 2020). Probably, older males confront COVID with more anxiety, distress and fear resulting on a higher vaccination uptake. Moreover, females' COVID-19 vaccine hesitancy may also be related with limited knowledge regarding issues such as pregnancy, fertility and breastfeeding (L. Nguyen et al., 2021; Schrading et al., 2021; Xu et al., 2021).

Our review identified that participants with higher self-perceived COVID-19 vulnerability were more likely to be vaccinated. This finding confirms that risk perception with regards to COVID-19 is critical to vaccination behavior (Caserotti et al., 2021). In particular, as risk perception and worry about contracting COVID-19 increase, so does the intention to accept a COVID-19 vaccine (Caserotti et al., 2021; Glöckner et al., 2020; Ward et al., 2020). Individuals that consider COVID-19 as a severe disease are more intent on taking a COVID-19 vaccine (Karlsson et al., 2021). Similarly, according to our review, self-estimation that COVID-19 is not a severe disease was a reason for people to refuse to have a COVID-19 vaccine (Malesza & Bozym, 2021). Interestingly, people were more likely to accept a COVID-19 vaccine during the lockdown periods when they felt more vulnerable (Brooks et al., 2020; Z. Li et al., 2020; Moccia et al., 2020). Moreover, the low self-perceived risk of contracting COVID-19 is related with low vaccination rate (Karlsson et al., 2021). This finding is confirmed by our review since we found that participants without a history of COVID-19 infection were more likely to be vaccinated, potentially due to a high self-perceived risk of contracting SARS-CoV-2 and/of negative clinical outcomes. Also, we found that previous COVID-19 diagnosis was a reason for decline

of vaccination. Probably, past COVID-19 patients feel protected against the disease and perceive a low risk of contracting SARS-CoV-2 again (Pacella-LaBarbara et al., 2021).

Also, we found that participants with a chronic illness were vaccinated more often than healthy participants. Worry about contracting COVID-19 increases the intention to accept a COVID-19 vaccine and probably people with medical conditions feel more fear, stress, worry, psychological distress, and anxiety during the COVID-19 pandemic (Blix et al., 2021; Salari et al., 2020; Xiong et al., 2020). Illness and medication cause a negative attitude towards COVID-19 vaccination since patients have concerns about the safety of vaccines and consider their illness as a contradiction of vaccination (L. Nguyen et al., 2021). In general, concerns about the safety and effectiveness of COVID-19 vaccines is the most important reason for decline of vaccination (Gibbon et al., 2021; Malesza & Bozym, 2021; L. Nguyen et al., 2021; Schrading et al., 2021; Wu et al., 2021). Similarly, according to our review, females fear that COVID-19 vaccines may cause problems in pregnancy, fertility, and breastfeeding and then refuse to take a COVID-19 vaccine (L. Nguyen et al., 2021; Schrading et al., 2021; Xu et al., 2021).

Moreover, concerns about safety, effectiveness, side-effects, and efficacy of COVID-19 vaccines and general distrust are related with hesitancy in COVID-19 vaccines uptake in the community (Freeman et al., 2020). According to WHO, vaccine hesitancy is a top ten global health threat in 2019 since it is one of main obstacles to control vaccine preventable diseases such as COVID-19 (Jaca et al., 2021; Wiysonge et al., 2021; World Health Organization, 2020). Moreover, vaccine hesitancy among healthcare workers warrants particular attention since they could put patients at risk and also their negative attitude towards COVID-19 vaccination may significantly decrease public uptake of COVID-19 vaccines (Gadoth et al., 2021; Schaffer DeRoo et al., 2020). This finding was confirmed by this review since we found that general population was vaccinated more often than healthcare workers and hesitant workers were more likely to change their opinion regarding COVID-19 vaccination than healthcare workers (McCabe et al., 2021). Healthcare workers are the most important predictor of vaccine acceptance in the general population and a strong recommendation from them could improve significantly vaccine acceptance (Allison et al., 2013; Dorell et al., 2011; Opel et al., 2013).

As we found in our review, limited knowledge about the vaccines decreases the probability to take a COVID-19 vaccine (L. Nguyen et al., 2021). Various cultural, social, political, personal, and religious factors contribute to vaccine hesitancy creating a complex issue (Kestenbaum & Feemster, 2015). In that case, knowledge is essential to decrease vaccine hesitancy since it is well known that misinformation and negative stories about vaccine safety in the social media and news create mistrust in biomedical sciences and negative attitudes towards vaccination (Dubé et al., 2013; Gust et al., 2005). Moreover, higher socioeconomic status was related with higher probability of COVID-19 vaccination uptake (Malesza & Bozym, 2021; McCabe et al., 2021; Schrading et al., 2021). Probably, higher education level and income are related with higher level of knowledge regarding vaccines, more trust in biomedical research and governments, and higher probability to afford the logistics regarding a vaccine uptake. Education programs have already proved effective to increase influenza vaccination rate and may be used as a guide in case of COVID-19 vaccination also (Black et al., 2018).

### **Limitations**

Our systematic review is subject to several limitations. Firstly, five out of 12 studies was of poor or moderate quality, while more than the half of studies was published in pre-print services without a peer-review process. Secondly, studies were conducted mainly in the USA and United Kingdom and thus the results could not be generalized. Thirdly, data collection time among studies ranged from December 2020 to May 2021. Availability of COVID-19 vaccines and knowledge regarding these vaccines are increasing significantly on an ongoing basis and people's attitudes towards COVID-19 vaccination could be changed. Moreover, all studies in our review were cross-sectional and thus causal inferences are impossible. Also, only nine studies investigated predictors of COVID-19 vaccination uptake and five studies investigated reasons for decline of COVID-19 vaccination. Additional research is needed to understand as soon as possible the factors that influence people's decision to take a COVID-19 vaccine. For instance, no study until now has investigated psychological factors that could affect people's attitudes towards COVID-19 vaccination uptake. Moreover, we should examine whether additional sociodemographic, infection-related and social media variables are related with COVID-19 vaccination uptake.

## **Conclusions**

Several factors affect COVID-19 vaccination uptake, while there are various reasons for decline of vaccination. For instance, males, older and white people take more often a COVID-19 vaccine. These findings are essential to further enhance our understanding of COVID-19 vaccination uptake and design specific interventions. Information campaigns with regards to COVID-19 vaccination are of paramount importance and should promote group strategies, focusing on informing the public about the safety of COVID-19 vaccines and addressing the concerns of people who are undecided or unlikely to take a COVID-19 vaccine. Also, these campaigns should offer reassurance, especially to groups that have more concerns about the safety of COVID-19 vaccines, e.g. females, young adults, people from ethnic minorities, people with limited knowledge about the vaccines etc. Large proportions of these populations are undecided and reliable COVID-19 vaccination information should be provided tailored to the needs of each sub-group. Given the high prevalence of COVID-19 vaccine hesitancy, our findings have major implications for the delivery of COVID-19 vaccination programmes in the public with special attention to the groups identified in this review.

## References

- Al-Amer, R., Maneze, D., Everett, B., Montayre, J., Villarosa, A. R., Dwekat, E., & Salamonson, Y. (2021). COVID-19 vaccination intention in the first year of the pandemic: A systematic review. *Journal of Clinical Nursing*. <https://doi.org/10.1111/jocn.15951>
- Allison, M. A., Dunne, E. F., Markowitz, L. E., O'Leary, S. T., Crane, L. A., Hurley, L. P., Stokley, S., Babbel, C. I., Brtnikova, M., Beaty, B. L., & Kempe, A. (2013). HPV vaccination of boys in primary care practices. *Academic Pediatrics*, *13*(5), 466–474. <https://doi.org/10.1016/j.acap.2013.03.006>
- Amit, S., Regev-Yochay, G., Afek, A., Kreiss, Y., & Leshem, E. (2021). Early rate reductions of SARS-CoV-2 infection and COVID-19 in BNT162b2 vaccine recipients. *Lancet (London, England)*, *397*(10277), 875–877. [https://doi.org/10.1016/S0140-6736\(21\)00448-7](https://doi.org/10.1016/S0140-6736(21)00448-7)
- Baden, L. R., El Sahly, H. M., Essink, B., Kotloff, K., Frey, S., Novak, R., Diemert, D., Spector, S. A., Rouphael, N., Creech, C. B., McGettigan, J., Khetan, S., Segall, N., Solis, J., Brosz, A., Fierro, C., Schwartz, H., Neuzil, K., Corey, L., ... Zaks, T. (2021). Efficacy and Safety of the mRNA-1273 SARS-CoV-2 Vaccine. *New England Journal of Medicine*, *384*(5), 403–416. <https://doi.org/10.1056/NEJMoa2035389>
- Barry, M., Temsah, M.-H., Aljamaan, F., Saddik, B., Al-Eyadhy, A., Alenezi, S., Alamro, N., Alhuzaimi, A. N., Alhaboob, A., Alhasan, K., Alsohime, F., Alaraj, A., Halwani, R., Jamal, A., Temsah, O., Alzamil, F., Somily, A., & Al-Tawfiq, J. A. (2021). COVID-19 vaccine uptake among healthcare workers in the fourth country to authorize BNT162b2 during the first month of rollout [Preprint]. Public and Global Health. <https://doi.org/10.1101/2021.01.29.21250749>
- Biennvenu, L. A., Noonan, J., Wang, X., & Peter, K. (2020). Higher mortality of COVID-19 in males: Sex differences in immune response and cardiovascular comorbidities. *Cardiovascular Research*, *116*(14), 2197–2206. <https://doi.org/10.1093/cvr/cvaa284>
- Black, C. L., Yue, X., Ball, S. W., Fink, R. V., de Perio, M. A., Laney, A. S., Williams, W. W., Graitcer, S. B., Fiebelkorn, A. P., Lu, P.-J., & Devlin, R. (2018). Influenza Vaccination Coverage Among Health Care Personnel—United States, 2017-18 Influenza Season. *MMWR. Morbidity and Mortality Weekly Report*, *67*(38), 1050–1054. <https://doi.org/10.15585/mmwr.mm6738a2>

- Blix, I., Birkeland, M. S., & Thoresen, S. (2021). Worry and mental health in the Covid-19 pandemic: Vulnerability factors in the general Norwegian population. *BMC Public Health*, 21(1), 928. <https://doi.org/10.1186/s12889-021-10927-1>
- Brooks, S. K., Webster, R. K., Smith, L. E., Woodland, L., Wessely, S., Greenberg, N., & Rubin, G. J. (2020). The psychological impact of quarantine and how to reduce it: Rapid review of the evidence. *The Lancet*, 395(10227), 912–920. [https://doi.org/10.1016/S0140-6736\(20\)30460-8](https://doi.org/10.1016/S0140-6736(20)30460-8)
- Butter, S., McGlinchey, E., Berry, E., & Armour, C. (2021). Psychological, social, and situational factors associated with COVID-19 vaccination intentions: A study of UK key workers and non-key workers. *British Journal of Health Psychology*, *bjhp.12530*. <https://doi.org/10.1111/bjhp.12530>
- Caserotti, M., Girardi, P., Rubaltelli, E., Tasso, A., Lotto, L., & Gavaruzzi, T. (2021). Associations of COVID-19 risk perception with vaccine hesitancy over time for Italian residents. *Social Science & Medicine* (1982), 272, 113688. <https://doi.org/10.1016/j.socscimed.2021.113688>
- Dagan, N., Barda, N., Kepten, E., Miron, O., Perchik, S., Katz, M. A., Hernán, M. A., Lipsitch, M., Reis, B., & Balicer, R. D. (2021). BNT162b2 mRNA Covid-19 Vaccine in a Nationwide Mass Vaccination Setting. *The New England Journal of Medicine*, 384(15), 1412–1423. <https://doi.org/10.1056/NEJMoa2101765>
- Dorell, C., Yankey, D., & Strasser, S. (2011). Parent-reported reasons for nonreceipt of recommended adolescent vaccinations, national immunization survey: Teen, 2009. *Clinical Pediatrics*, 50(12), 1116–1124. <https://doi.org/10.1177/0009922811415104>
- Dror, A. A., Eisenbach, N., Taiber, S., Morozov, N. G., Mizrachi, M., Zigran, A., Srouji, S., & Sela, E. (2020). Vaccine hesitancy: The next challenge in the fight against COVID-19. *European Journal of Epidemiology*, 35(8), 775–779. <https://doi.org/10.1007/s10654-020-00671-y>
- Dubé, E., Laberge, C., Guay, M., Bramadat, P., Roy, R., & Bettinger, J. (2013). Vaccine hesitancy: An overview. *Human Vaccines & Immunotherapeutics*, 9(8), 1763–1773. <https://doi.org/10.4161/hv.24657>
- Forster, A. S., Rockliffe, L., Chorley, A. J., Marlow, L. A. V., Bedford, H., Smith, S. G., & Waller, J. (2017). Ethnicity-specific factors influencing childhood immunisation decisions among Black and Asian Minority Ethnic groups in the UK: A systematic review of qualitative research. *Journal of Epidemiology and Community Health*, 71(6), 544–549. <https://doi.org/10.1136/jech-2016-207366>



- Franz, B., Milner, A., & Braddock, I. J. H. (2021). Do Black Lives Matter in the American Public's Mitigation Responses to the COVID-19 Pandemic? An Analysis of Mask Wearing and Racial/Ethnic Disparities in Deaths from COVID-19. *Journal of Racial and Ethnic Health Disparities*. <https://doi.org/10.1007/s40615-021-01097-2>
- Freeman, D., Loe, B. S., Chadwick, A., Vaccari, C., Waite, F., Rosebrock, L., Jenner, L., Petit, A., Lewandowsky, S., Vanderslott, S., Innocenti, S., Larkin, M., Giubilini, A., Yu, L.-M., McShane, H., Pollard, A. J., & Lambe, S. (2020). COVID-19 vaccine hesitancy in the UK: The Oxford coronavirus explanations, attitudes, and narratives survey (Oceans) II. *Psychological Medicine*, 1–15. <https://doi.org/10.1017/S0033291720005188>
- Funk, C., & Tyson, A. (2021). *Growing share of Americans say they plan to get a COVID-19 vaccine – or already have*. Pew Research Center. <https://www.pewresearch.org/science/2021/03/05/growing-share-of-americans-say-they-plan-to-get-a-covid-19-vaccine-or-already-have/>
- Gadoth, A., Halbrook, M., Martin-Blais, R., Gray, A., Tobin, N. H., Ferbas, K. G., Aldrovandi, G. M., & Rimoin, A. W. (2021). Cross-sectional Assessment of COVID-19 Vaccine Acceptance Among Health Care Workers in Los Angeles. *Annals of Internal Medicine*, 174(6), 882–885. <https://doi.org/10.7326/M20-7580>
- Gagneux-Brunon, A., Detoc, M., Bruel, S., Tardy, B., Rozaire, O., Frappe, P., & Botelho-Nevers, E. (2021). Intention to get vaccinations against COVID-19 in French healthcare workers during the first pandemic wave: A cross-sectional survey. *The Journal of Hospital Infection*, 108, 168–173. <https://doi.org/10.1016/j.jhin.2020.11.020>
- Galanis, P. A., Vrakka, I., Fragkou, D., Bilali, A., & Kaitelidou, D. (2020). *Intention of health care workers to accept COVID-19 vaccination and related factors: A systematic review and meta-analysis* [Preprint]. Public and Global Health. <https://doi.org/10.1101/2020.12.08.20246041>
- Gamble, V. N. (1997). Under the shadow of Tuskegee: African Americans and health care. *American Journal of Public Health*, 87(11), 1773–1778. <https://doi.org/10.2105/AJPH.87.11.1773>
- Gharpure, R., Guo, A., Bishnoi, C. K., Patel, U., Gifford, D., Tippins, A., Jaffe, A., Shulman, E., Stone, N., Mungai, E., Bagchi, S., Bell, J., Srinivasan, A., Patel, A., & Link-Gelles, R. (2021). Early COVID-19 First-Dose Vaccination Coverage Among Residents and Staff Members of Skilled Nursing Facilities Participating in the



Pharmacy Partnership for Long-Term Care Program—United States, December 2020–January 2021. *MMWR. Morbidity and Mortality Weekly Report*, 70(5), 178–182. <https://doi.org/10.15585/mmwr.mm7005e2>

Gibbon, S., McPhail, E., Mills, G., McBride, M., Storer, R., Taylor, N., & McCarthy, L. (2021). Uptake of COVID-19 vaccination in a medium secure psychiatric hospital population. *BJPsych Open*, 7(4), e108. <https://doi.org/10.1192/bjo.2021.924>

Glampson, B., Brittain, J., Kaura, A., Mulla, A., Mercuri, L., Brett, S., Aylin, P., Sandall, T., Goodman, I., Redhead, J., Saravanakumar, K., & Mayer, E. K. (2021). *North West London Covid-19 Vaccination Programme: Real-world evidence for Vaccine uptake and effectiveness* [Preprint]. Health Informatics. <https://doi.org/10.1101/2021.04.08.21254580>

Glöckner, A., Dorrough, A. R., Wingen, T., & Dohle, S. (2020). *The Perception of Infection Risks during the Early and Later Outbreak of COVID-19 in Germany: Consequences and Recommendations* [Preprint]. PsyArXiv. <https://doi.org/10.31234/osf.io/wdbgc>

Gust, D. A., Kennedy, A., Shui, I., Smith, P. J., Nowak, G., & Pickering, L. K. (2005). Parent attitudes toward immunizations and healthcare providers the role of information. *American Journal of Preventive Medicine*, 29(2), 105–112. <https://doi.org/10.1016/j.amepre.2005.04.010>

Haas, E. J., Angulo, F. J., McLaughlin, J. M., Anis, E., Singer, S. R., Khan, F., Brooks, N., Smaja, M., Mircus, G., Pan, K., Southern, J., Swerdlow, D. L., Jodar, L., Levy, Y., & Alroy-Preis, S. (2021). Impact and effectiveness of mRNA BNT162b2 vaccine against SARS-CoV-2 infections and COVID-19 cases, hospitalisations, and deaths following a nationwide vaccination campaign in Israel: An observational study using national surveillance data. *The Lancet*, 397(10287), 1819–1829. [https://doi.org/10.1016/S0140-6736\(21\)00947-8](https://doi.org/10.1016/S0140-6736(21)00947-8)

Hall, V. J., Foulkes, S., Charlett, A., Atti, A., Monk, E. J. M., Simmons, R., Wellington, E., Cole, M. J., Saei, A., Oguti, B., Munro, K., Wallace, S., Kirwan, P. D., Shrotri, M., Vusirikala, A., Rokadiya, S., Kall, M., Zambon, M., Ramsay, M., ... SIREN Study Group. (2021). SARS-CoV-2 infection rates of antibody-positive compared with antibody-negative health-care workers in England: A large, multicentre, prospective cohort study (SIREN). *Lancet (London, England)*, 397(10283), 1459–1469. [https://doi.org/10.1016/S0140-6736\(21\)00675-9](https://doi.org/10.1016/S0140-6736(21)00675-9)

- Hamel, L., Kirzinger, A., Lopes, L., Sparks, G., Kearney, A., Stokes, M., & Brodie, M. (2021). *KFF COVID-19 vaccine monitor: May 2021*. Kaiser Family Foundation. <https://www.kff.org/coronavirus-covid-19/poll-finding/kff-covid-19-vaccine-monitor-may-2021/>
- Jaca, A., Iwu-Jaja, C. J., Balakrishna, Y., Pienaar, E., & Wiysonge, C. S. (2021). A global bibliometric analysis of research productivity on vaccine hesitancy from 1974 to 2019. *Human Vaccines & Immunotherapeutics*, 1–7. <https://doi.org/10.1080/21645515.2021.1903294>
- Karlsson, L. C., Soveri, A., Lewandowsky, S., Karlsson, L., Karlsson, H., Nolvi, S., Karukivi, M., Lindfelt, M., & Antfolk, J. (2021). Fearing the disease or the vaccine: The case of COVID-19. *Personality and Individual Differences*, 172, 110590. <https://doi.org/10.1016/j.paid.2020.110590>
- Kestenbaum, L. A., & Feemster, K. A. (2015). Identifying and Addressing Vaccine Hesitancy. *Pediatric Annals*, 44(4). <https://doi.org/10.3928/00904481-20150410-07>
- Khalife, J., & VanGennep, D. (2021). COVID-19 herd immunity in the absence of a vaccine: An irresponsible approach. *Epidemiology and Health*, 43, e2021012. <https://doi.org/10.4178/epih.e2021012>
- Khubchandani, J., Sharma, S., Price, J. H., Wiblishauser, M. J., Sharma, M., & Webb, F. J. (2021). COVID-19 Vaccination Hesitancy in the United States: A Rapid National Assessment. *Journal of Community Health*, 46(2), 270–277. <https://doi.org/10.1007/s10900-020-00958-x>
- Lacsa, J. E. M., & Cordero, D. A. (2021). We are here...so where's the vaccine? Achieving 'herd immunity' in the midst of the COVID-19 pandemic. *Journal of Public Health*, fdab195. <https://doi.org/10.1093/pubmed/fdab195>
- Lazarus, J. V., Ratzan, S. C., Palayew, A., Gostin, L. O., Larson, H. J., Rabin, K., Kimball, S., & El-Mohandes, A. (2021). A global survey of potential acceptance of a COVID-19 vaccine. *Nature Medicine*, 27(2), 225–228. <https://doi.org/10.1038/s41591-020-1124-9>
- Li, M., Luo, Y., Watson, R., Zheng, Y., Ren, J., Tang, J., & Chen, Y. (2021). Healthcare workers' (HCWs) attitudes and related factors towards COVID-19 vaccination: A rapid systematic review. *Postgraduate Medical Journal*, postgradmedj-2021-140195. <https://doi.org/10.1136/postgradmedj-2021-140195>
- Li, Z., Ge, J., Yang, M., Feng, J., Qiao, M., Jiang, R., Bi, J., Zhan, G., Xu, X., Wang, L., Zhou, Q., Zhou, C., Pan, Y., Liu, S., Zhang, H., Yang, J., Zhu, B., Hu, Y.,

- Hashimoto, K., ... Yang, C. (2020). Vicarious traumatization in the general public, members, and non-members of medical teams aiding in COVID-19 control. *Brain, Behavior, and Immunity*, 88, 916–919. <https://doi.org/10.1016/j.bbi.2020.03.007>
- Logunov, D. Y., Dolzhikova, I. V., Shcheblyakov, D. V., Tukhvatulin, A. I., Zubkova, O. V., Dzharullaeva, A. S., Kovyrshina, A. V., Lubenets, N. L., Grousova, D. M., Erokhova, A. S., Botikov, A. G., Izhaeva, F. M., Popova, O., Ozharovskaya, T. A., Esmagambetov, I. B., Favorskaya, I. A., Zrelkin, D. I., Voronina, D. V., Shcherbinin, D. N., ... Gintsburg, A. L. (2021). Safety and efficacy of an rAd26 and rAd5 vector-based heterologous prime-boost COVID-19 vaccine: An interim analysis of a randomised controlled phase 3 trial in Russia. *The Lancet*, 397(10275), 671–681. [https://doi.org/10.1016/S0140-6736\(21\)00234-8](https://doi.org/10.1016/S0140-6736(21)00234-8)
- MacIntyre, C. R., Costantino, V., & Trent, M. (2021). Modelling of COVID-19 vaccination strategies and herd immunity, in scenarios of limited and full vaccine supply in NSW, Australia. *Vaccine*, S0264-410X(21)00501-6. <https://doi.org/10.1016/j.vaccine.2021.04.042>
- Malesza, M., & Bozym, M. (2021). *Factors influencing COVID-19 vaccination uptake in an elderly sample in Poland* [Preprint]. Public and Global Health. <https://doi.org/10.1101/2021.03.21.21254047>
- Malik, A. A., McFadden, S. M., Elharake, J., & Omer, S. B. (2020). Determinants of COVID-19 vaccine acceptance in the US. *EClinicalMedicine*, 26, 100495. <https://doi.org/10.1016/j.eclinm.2020.100495>
- Martin, C. A., Jenkins, D. R., Minhas, J. S., Gray, L. J., Tang, J., Williams, C., Sze, S., Pan, D., Jones, W., Verma, R., Knapp, S., Major, R., Davies, M., Brunskill, N., Wiselka, M., Brightling, C., Khunti, K., Haldar, P., Pareek, M., & Leicester COVID-19 consortium. (2020). Socio-demographic heterogeneity in the prevalence of COVID-19 during lockdown is associated with ethnicity and household size: Results from an observational cohort study. *EClinicalMedicine*, 25, 100466. <https://doi.org/10.1016/j.eclinm.2020.100466>
- Martin, C. A., Marshall, C., Patel, P., Goss, C., Jenkins, D. R., Ellwood, C., Barton, L., Price, A., Brunskill, N. J., Khunti, K., & Pareek, M. (2021). *Association of demographic and occupational factors with SARS-CoV-2 vaccine uptake in a multi-ethnic UK healthcare workforce: A rapid real-world analysis* [Preprint]. Public and Global Health. <https://doi.org/10.1101/2021.02.11.21251548>

- Martin, C. A., Patel, P., Goss, C., Jenkins, D. R., Price, A., Barton, L., Gupta, P., Zaccardi, F., Jerina, H., Duraisingham, S., Brunskill, N. J., Khunti, K., & Pareek, M. (2020). Demographic and occupational determinants of anti-SARS-CoV-2 IgG seropositivity in hospital staff. *Journal of Public Health (Oxford, England)*, fdaa199. <https://doi.org/10.1093/pubmed/fdaa199>
- McCabe, S. D., Hammershaimb, E. A., Cheng, D., Shi, A., Shyr, D., Shen, S., Cole, L. D., Cataldi, J. R., Allen, W., Probasco, R., Silbermann, B., Zhang, F., Marsh, R., Travassos, M. A., & Lin, X. (2021). *Unraveling Attributes of COVID-19 Vaccine Hesitancy and Uptake in the U.S.: A Large Nationwide Study* [Preprint]. *Infectious Diseases (except HIV/AIDS)*. <https://doi.org/10.1101/2021.04.05.21254918>
- Mehraeen, E., Karimi, A., Barzegary, A., Vahedi, F., Afsahi, A. M., Dadras, O., Moradmamand-Badie, B., Seyed Alinaghi, S. A., & Jahanfar, S. (2020). Predictors of mortality in patients with COVID-19—a systematic review. *European Journal of Integrative Medicine*, 40, 101226. <https://doi.org/10.1016/j.eujim.2020.101226>
- Mills, M., Rahal, C., Brazel, D., Yan, J., & Gieysztor, S. (2020). *COVID-19 vaccine deployment: Behaviour, ethics, misinformation and policy strategies* (pp. 1–35). The Royal Society. <https://royalsociety.org/-/media/policy/projects/set-c/set-c-vaccine-deployment.pdf?la=en-GB&hash=43073E5429C87FD2674201CA>
- Moccia, L., Janiri, D., Pepe, M., Dattoli, L., Molinaro, M., De Martin, V., Chieffo, D., Janiri, L., Fiorillo, A., Sani, G., & Di Nicola, M. (2020). Affective temperament, attachment style, and the psychological impact of the COVID-19 outbreak: An early report on the Italian general population. *Brain, Behavior, and Immunity*, 87, 75–79. <https://doi.org/10.1016/j.bbi.2020.04.048>
- Moher, D., Liberati, A., Tetzlaff, J., Altman, D. G., & The PRISMA Group. (2009). Preferred Reporting Items for Systematic Reviews and Meta-Analyses: The PRISMA Statement. *PLoS Medicine*, 6(7), e1000097. <https://doi.org/10.1371/journal.pmed.1000097>
- Murphy, J., Vallières, F., Bentall, R. P., Shevlin, M., McBride, O., Hartman, T. K., McKay, R., Bennett, K., Mason, L., Gibson-Miller, J., Levita, L., Martinez, A. P., Stocks, T. V. A., Karatzias, T., & Hyland, P. (2021). Psychological characteristics associated with COVID-19 vaccine hesitancy and resistance in Ireland and the United Kingdom. *Nature Communications*, 12(1), 29. <https://doi.org/10.1038/s41467-020-20226-9>

- Nguyen, K. H., Srivastav, A., Razzaghi, H., Williams, W., Lindley, M. C., Jorgensen, C., Abad, N., & Singleton, J. A. (2021). COVID-19 vaccination intent, perceptions, and reasons for not vaccinating among groups prioritized for early vaccination—United States, September and December 2020. *American Journal of Transplantation: Official Journal of the American Society of Transplantation and the American Society of Transplant Surgeons*, 21(4), 1650–1656. <https://doi.org/10.1111/ajt.16560>
- Nguyen, L., Joshi, A. D., Drew, D. A., Merino, J., Ma, W., Lo, C.-H., Kwon, S., Wang, K., Graham, M. S., Polidori, L., Menni, C., Sudre, C. H., Anyane-Yeboah, A., Astley, C. M., Warner, E. T., Hu, C. Y., Selvachandran, S., Davies, R., Nash, D., ... Chan, A. T. (2021). Racial and ethnic differences in COVID-19 vaccine hesitancy and uptake. *MedRxiv: The Preprint Server for Health Sciences*, 2021.02.25.21252402. <https://doi.org/10.1101/2021.02.25.21252402>
- Opel, D. J., Heritage, J., Taylor, J. A., Mangione-Smith, R., Salas, H. S., De Vere, V., Zhou, C., & Robinson, J. D. (2013). The Architecture of Provider-Parent Vaccine Discussions at Health Supervision Visits. *PEDIATRICS*, 132(6), 1037–1046. <https://doi.org/10.1542/peds.2013-2037>
- Pacella-LaBarbara, M. L., Park, Y., Patterson, D., Doshi, A., Guyette, M., Wong, A. H., Chang, B. P., & Suffoletto, B. P. (2021). COVID-19 Vaccine Uptake and Intent Among Emergency Healthcare Workers: A Cross-Sectional Survey. *Journal of Occupational and Environmental Medicine*. <https://doi.org/10.1097/JOM.0000000000002298>
- Peckham, H., de Grujter, N. M., Raine, C., Radziszewska, A., Ciurtin, C., Wedderburn, L. R., Rosser, E. C., Webb, K., & Deakin, C. T. (2020). Male sex identified by global COVID-19 meta-analysis as a risk factor for death and ITU admission. *Nature Communications*, 11(1), 6317. <https://doi.org/10.1038/s41467-020-19741-6>
- Polack, F. P., Thomas, S. J., Kitchin, N., Absalon, J., Gurtman, A., Lockhart, S., Perez, J. L., Pérez Marc, G., Moreira, E. D., Zerbini, C., Bailey, R., Swanson, K. A., Roychoudhury, S., Koury, K., Li, P., Kalina, W. V., Cooper, D., Frenck, R. W., Hammitt, L. L., ... C4591001 Clinical Trial Group. (2020). Safety and Efficacy of the BNT162b2 mRNA Covid-19 Vaccine. *The New England Journal of Medicine*, 383(27), 2603–2615. <https://doi.org/10.1056/NEJMoa2034577>

- Ruiz, J. B., & Bell, R. A. (2021). Predictors of intention to vaccinate against COVID-19: Results of a nationwide survey. *Vaccine*, 39(7), 1080–1086. <https://doi.org/10.1016/j.vaccine.2021.01.010>
- Salari, N., Hosseini-Far, A., Jalali, R., Vaisi-Raygani, A., Rasoulpoor, S., Mohammadi, M., Rasoulpoor, S., & Khaledi-Paveh, B. (2020). Prevalence of stress, anxiety, depression among the general population during the COVID-19 pandemic: A systematic review and meta-analysis. *Globalization and Health*, 16(1), 57. <https://doi.org/10.1186/s12992-020-00589-w>
- Sallam, M. (2021). COVID-19 Vaccine Hesitancy Worldwide: A Concise Systematic Review of Vaccine Acceptance Rates. *Vaccines*, 9(2), 160. <https://doi.org/10.3390/vaccines9020160>
- Santos, W. M. dos, Secoli, S. R., & Püschel, V. A. de A. (2018). The Joanna Briggs Institute approach for systematic reviews. *Revista Latino-Americana de Enfermagem*, 26(0). <https://doi.org/10.1590/1518-8345.2885.3074>
- Schaffer DeRoo, S., Pudalov, N. J., & Fu, L. Y. (2020). Planning for a COVID-19 Vaccination Program. *JAMA*, 323(24), 2458–2459. <https://doi.org/10.1001/jama.2020.8711>
- Schrading, W. A., Trent, S. A., Paxton, J. H., Rodriguez, R. M., Swanson, M. B., Mohr, N. M., Talan, D. A., & Project COVERED Emergency Department Network. (2021). Vaccination rates and acceptance of SARS-CoV-2 vaccination among U.S. emergency department health care personnel. *Academic Emergency Medicine: Official Journal of the Society for Academic Emergency Medicine*, 28(4), 455–458. <https://doi.org/10.1111/acem.14236>
- Sepandi, M., Taghdir, M., Alimohamadi, Y., Afrashteh, S., & Hosamirudsari, H. (2020). Factors Associated with Mortality in COVID-19 Patients: A Systematic Review and Meta-Analysis. *Iranian Journal of Public Health*, 49(7), 1211–1221. <https://doi.org/10.18502/ijph.v49i7.3574>
- Sze, S., Pan, D., Nevill, C. R., Gray, L. J., Martin, C. A., Nazareth, J., Minhas, J. S., Divall, P., Khunti, K., Abrams, K. R., Nellums, L. B., & Pareek, M. (2020). Ethnicity and clinical outcomes in COVID-19: A systematic review and meta-analysis. *EClinicalMedicine*, 29, 100630. <https://doi.org/10.1016/j.eclinm.2020.100630>
- The OpenSAFELY Collaborative, Curtis, H. J., Inglesby, P., Morton, C. E., MacKenna, B., Walker, A. J., Morley, J., Mehrkar, A., Bacon, S., Hickman, G., Bates, C., Croker, R., Evans, D., Ward, T., Cockburn, J., Davy, S., Bhaskaran, K., Schultze,



A., Rentsch, C. T., ... Goldacre, B. (2021). *Trends and clinical characteristics of COVID-19 vaccine recipients: A federated analysis of 57.9 million patients' primary care records in situ using OpenSAFELY* [Preprint]. Public and Global Health. <https://doi.org/10.1101/2021.01.25.21250356>

Vasileiou, E., Simpson, C. R., Shi, T., Kerr, S., Agrawal, U., Akbari, A., Bedston, S., Beggs, J., Bradley, D., Chuter, A., de Lusignan, S., Docherty, A. B., Ford, D., Hobbs, F. R., Joy, M., Katikireddi, S. V., Marple, J., McCowan, C., McGagh, D., ... Sheikh, A. (2021). Interim findings from first-dose mass COVID-19 vaccination roll-out and COVID-19 hospital admissions in Scotland: A national prospective cohort study. *Lancet (London, England)*, 397(10285), 1646–1657. [https://doi.org/10.1016/S0140-6736\(21\)00677-2](https://doi.org/10.1016/S0140-6736(21)00677-2)

Voysey, M., Clemens, S. A. C., Madhi, S. A., Weckx, L. Y., Folegatti, P. M., Aley, P. K., Angus, B., Baillie, V. L., Barnabas, S. L., Borat, Q. E., Bibi, S., Briner, C., Cicconi, P., Collins, A. M., Colin-Jones, R., Cutland, C. L., Darton, T. C., Dheda, K., Duncan, C. J. A., ... Oxford COVID Vaccine Trial Group. (2021). Safety and efficacy of the ChAdOx1 nCoV-19 vaccine (AZD1222) against SARS-CoV-2: An interim analysis of four randomised controlled trials in Brazil, South Africa, and the UK. *Lancet (London, England)*, 397(10269), 99–111. [https://doi.org/10.1016/S0140-6736\(20\)32661-1](https://doi.org/10.1016/S0140-6736(20)32661-1)

Ward, J. K., Alleaume, C., Peretti-Watel, P., Peretti-Watel, P., Seror, V., Cortaredona, S., Launay, O., Raude, J., Verger, P., Beck, F., Legleye, S., L'Haridon, O., & Ward, J. (2020). The French public's attitudes to a future COVID-19 vaccine: The politicization of a public health issue. *Social Science & Medicine*, 265, 113414. <https://doi.org/10.1016/j.socscimed.2020.113414>

Wiysonge, C. S., Ndwandwe, D., Ryan, J., Jaca, A., Batouré, O., Anya, B.-P. M., & Cooper, S. (2021). Vaccine hesitancy in the era of COVID-19: Could lessons from the past help in divining the future? *Human Vaccines & Immunotherapeutics*, 1–3. <https://doi.org/10.1080/21645515.2021.1893062>

World Health Organization. (2020). *Ten threats to global health in 2019*. <https://www.who.int/news-room/spotlight/ten-threats-to-global-health-in-2019>

Wu, Z., Hu, Y., Xu, M., Chen, Z., Yang, W., Jiang, Z., Li, M., Jin, H., Cui, G., Chen, P., Wang, L., Zhao, G., Ding, Y., Zhao, Y., & Yin, W. (2021). Safety, tolerability, and immunogenicity of an inactivated SARS-CoV-2 vaccine (CoronaVac) in healthy adults aged 60 years and older: A randomised, double-blind, placebo-controlled,

phase 1/2 clinical trial. *The Lancet Infectious Diseases*, 21(6), 803–812. [https://doi.org/10.1016/S1473-3099\(20\)30987-7](https://doi.org/10.1016/S1473-3099(20)30987-7)

Xiong, J., Lipsitz, O., Nasri, F., Lui, L. M. W., Gill, H., Phan, L., Chen-Li, D., Iacobucci, M., Ho, R., Majeed, A., & McIntyre, R. S. (2020). Impact of COVID-19 pandemic on mental health in the general population: A systematic review. *Journal of Affective Disorders*, 277, 55–64. <https://doi.org/10.1016/j.jad.2020.08.001>

Xu, B., Gao, X., Zhang, X., Hu, Y., Yang, H., & Zhou, Y.-H. (2021). Real-World Acceptance of COVID-19 Vaccines among Healthcare Workers in Perinatal Medicine in China. *Vaccines*, 9(7), 704. <https://doi.org/10.3390/vaccines9070704>

Yanez, N. D., Weiss, N. S., Romand, J.-A., & Treggiari, M. M. (2020). COVID-19 mortality risk for older men and women. *BMC Public Health*, 20(1), 1742. <https://doi.org/10.1186/s12889-020-09826-8>



**Figure 1.** Flowchart of the literature search according to the Preferred Reporting Items for Systematic Reviews and Meta-Analysis.

Table 1. Overview of the studies included in this systematic review.

| Reference                        | Country        | Data collection time            | Sample size (n) | Age, mean (SD)                                                                                  | Population                                                                                                              | Study design    | Sampling method      | Response rate (%) | COVID-19 vaccination uptake (%) | Publication in |
|----------------------------------|----------------|---------------------------------|-----------------|-------------------------------------------------------------------------------------------------|-------------------------------------------------------------------------------------------------------------------------|-----------------|----------------------|-------------------|---------------------------------|----------------|
| (Pacella-LaBarbara et al., 2021) | USA            | January 12 to February 12, 2021 | 475             | 41.0 (13.3)                                                                                     | Emergency medical service workers (n=315), nurses and patient care technicians (n=70), physicians (n=25), others (n=65) | Cross-sectional | Convenience sampling | 90.6              | 79 <sup>a</sup>                 | Journal        |
| (Schrading et al., 2021)         | USA            | January 2021                    | 1321            | 22-29 years, 20.1%; 30-39 years, 38.7%; 40-49 years, 22.1%; 50-64 years, 17.9%; ≥65 years, 1.2% | Physicians (n=691), nurses (n=360), nonclinical staff (n=347)                                                           | Cross-sectional | Convenience sampling | 90.7              | 94.5                            | Journal        |
| (Gibbon et al., 2021)            | United Kingdom | NR                              | 85              | 38.7 (NR)                                                                                       | Patients in a medium secure psychiatric hospital                                                                        | Cross-sectional | Convenience sampling | 100               | 80                              | Journal        |
| (Xu et al., 2021)                | China          | April,                          | 1051            | 18-30 years, 19.4%; 31-                                                                         | Healthcare workers                                                                                                      | Cross-          | Convenience          | NR                | 86.2                            | Journal        |

|                          |                         |                                       |           |                                                                             |                                                          |                 |                      |    |                                               |                   |
|--------------------------|-------------------------|---------------------------------------|-----------|-----------------------------------------------------------------------------|----------------------------------------------------------|-----------------|----------------------|----|-----------------------------------------------|-------------------|
|                          |                         | 2021                                  |           | 40 years, 36%; 41-50 years, 26.5%; 51-60 years, 18.1%                       | in perinatal medicine                                    | sectional       | sampling             |    |                                               |                   |
| (Gharpure et al., 2021)  | USA                     | December 18, 2020 to January 17, 2021 | NR        | NR                                                                          | Residents and staff members of long-term care facilities | Cross-sectional | Convenience sampling | NR | 77.8 for residents and 37.5 for staff members | Journal           |
| (L. Nguyen et al., 2021) | USA, United Kingdom     | January 7 to February 16, 2021        | 1,341,682 | <44 years, 24.9%; ≥45 years, 75.1%                                          | General population                                       | Cross-sectional | Convenience sampling | NR | 28.6                                          | Pre-print service |
| (McCabe et al., 2021)    | USA                     | February 12 to May 6, 2021            | 18,680    | ≤45 years, 58.5%; >45 years, 41.5%                                          | General population                                       | Cross-sectional | Convenience sampling | NR | 98                                            | Pre-print service |
| (Barry et al., 2021)     | Kingdom of Saudi Arabia | December 27, 2020 to January 3, 2021  | 1058      | 20-30 years, 22.5%; 31-40 years, 44.5%; 41-50 years, 24.9%; ≥51 years, 8.1% | Nurses (59.2%), physicians (38.1%), students (2.7%)      | Cross-sectional | Convenience sampling | NR | 33.3 <sup>a</sup>                             | Pre-print service |
| (Glampson et al., 2021)  | United Kingdom          | February 2021                         | 2,183,939 | NR                                                                          | General population                                       | Cross-sectional | Convenience sampling | NR | 94.1                                          | Pre-print service |

|                                             |                |                                       |            |                                      |                     |                 |                      |      |                   |                   |
|---------------------------------------------|----------------|---------------------------------------|------------|--------------------------------------|---------------------|-----------------|----------------------|------|-------------------|-------------------|
| (Malesza & Bozym, 2021)                     | Poland         | January to February, 2021             | 1427       | 70-79 years, 43.9%; ≥80 years, 56.1% | Elderly (≥70 years) | Cross-sectional | Convenience sampling | 78.3 | 62.7 <sup>a</sup> | Pre-print service |
| (The OpenSAFELY Collaborative et al., 2021) | United Kingdom | December 8, 2020 to March 17, 2021    | 20,852,692 | <65 years, 79.3%; ≥65 years, 20.7%   | Patients            | Cross-sectional | Convenience sampling | NR   | 36.0              | Pre-print service |
| (Martin et al., 2021)                       | United Kingdom | December 12, 2020 to January 15, 2021 | 12,278     | <40 years, 24.5%; ≥40 years, 75.5%   | Healthcare workers  | Cross-sectional | Convenience sampling | NR   | 64.5              | Pre-print service |

CI: confidence interval; NR: not reported; OR: odds ratio, SD: standard deviation

<sup>a</sup> percentage of participants that received or were signed up for COVID-19 vaccines

Table 2. Quality of cross-sectional studies included in this systematic review.

|                                                                             | (Pacella-LaBarbara et al., 2021) | (Schrading et al., 2021) | (Gibbon et al., 2021) | (Xu et al., 2021) | (Gharpure et al., 2021) | (L. Nguyen et al., 2021) | (McCabe et al., 2021) | (Barry et al., 2021) | (Glampson et al., 2021) | (Malesza & Bozym, 2021) | (The OpenSAFELY Collaborative et al., 2021) | (Martin et al., 2021) |
|-----------------------------------------------------------------------------|----------------------------------|--------------------------|-----------------------|-------------------|-------------------------|--------------------------|-----------------------|----------------------|-------------------------|-------------------------|---------------------------------------------|-----------------------|
| 1. Were the criteria for inclusion in the sample clearly defined?           | √                                | √                        | √                     | √                 | √                       | √                        | √                     | √                    | √                       | √                       | √                                           | √                     |
| 2. Were the study subjects and the setting described in detail?             | √                                | √                        |                       | √                 |                         | √                        | √                     | √                    |                         | √                       | √                                           | √                     |
| 3. Was the exposure measured in a valid and reliable way?                   | √                                | √                        |                       | √                 |                         | √                        | √                     | √                    | √                       | √                       | √                                           | √                     |
| 4. Were objective, standard criteria used for measurement of the condition? | √                                | √                        | √                     | √                 | √                       | √                        | √                     | √                    | √                       | √                       | √                                           | √                     |
| 5. Were confounding factors identified?                                     | √                                |                          |                       | √                 |                         | √                        | √                     | √                    |                         | √                       |                                             | √                     |
| 6. Were strategies to deal with confounding factors stated?                 | √                                |                          |                       | √                 |                         | √                        | √                     | √                    |                         | √                       |                                             | √                     |

|                                                            |      |          |      |      |          |      |      |      |          |      |          |      |
|------------------------------------------------------------|------|----------|------|------|----------|------|------|------|----------|------|----------|------|
| 7. Were the outcomes measured in a valid and reliable way? | √    | √        | √    | √    | √        | √    | √    | √    | √        | √    | √        | √    |
| 8. Was appropriate statistical analysis used?              | √    |          |      | √    | √        | √    | √    | √    | √        | √    | √        | √    |
| <b>Total quality</b>                                       | Good | Moderate | Poor | Good | Moderate | Good | Good | Good | Moderate | Good | Moderate | Good |

Table 3. Predictors of COVID-19 vaccination uptake and reasons for decline of vaccination.

| Reference                        | Predictors of COVID-19 vaccination uptake                                                                                                                                                                                                                                                                                                                                                                  | Reasons for decline of COVID-19 vaccination                                                                                                                                                                                                  |
|----------------------------------|------------------------------------------------------------------------------------------------------------------------------------------------------------------------------------------------------------------------------------------------------------------------------------------------------------------------------------------------------------------------------------------------------------|----------------------------------------------------------------------------------------------------------------------------------------------------------------------------------------------------------------------------------------------|
| (Pacella-LaBarbara et al., 2021) | Vaccination uptake was higher among: (a) males (OR=2.94; 95% CI=1.1 to 4.17; p-value=0.02), (b) participants without a history of COVID-19 infection (OR=1.82; 95% CI=1.02 to 3.23; p-value=0.041), (c) participants with advanced degree (OR=3.53; 95% CI=1.16 to 10.77; p-value=0.026), and (d) participants with higher perceived COVID-19 vulnerability (OR=1.99; 95% CI=1.37 to 2.90; p-value<0.001). |                                                                                                                                                                                                                                              |
| (Schradling et al., 2021)        | Vaccination uptake was higher: (a) among physicians (94.5%) than nurses (77.7%) and nonclinical staff (76.5%), (b) among males (93.5%) than females (81.6%), and (c) among white individuals (88.5%) than black individuals (65.4%).                                                                                                                                                                       | Safety of vaccines (45.4%), health condition (13.5%), previous COVID-19 diagnosis (13.5%), pregnancy/fertility (11.9%), religious/ethical/personal reasons (8.6%), concerns about vaccines efficacy (8.1%), and logistics/scheduling (4.3%). |
| (Gibbon et al., 2021)            | Vaccination uptake was higher among white British patients (83.1%) than Black Asian minority ethnic patients (70%).                                                                                                                                                                                                                                                                                        | Concerns about the safety of vaccines (29.4%) and patient perception of having a low risk from the COVID-19 (23.5%).                                                                                                                         |
| (Xu et al., 2021)                |                                                                                                                                                                                                                                                                                                                                                                                                            | Concerns about the safety of vaccines, pregnancy, breastfeeding                                                                                                                                                                              |
| (L. Nguyen et al., 2021)         | Vaccination uptake was higher among white participants than Black participants (OR=1.41; 95% CI=1.27 to 1.56; p-value<0.001).                                                                                                                                                                                                                                                                              | Concerns about the safety of vaccines, limited knowledge about the vaccines, religious/ethical/personal reasons, illness/medication, pregnancy, and breastfeeding.                                                                           |
| (McCabe et al., 2021)            | Vaccination uptake was lower among black participants, younger participants, healthcare workers, participants from lower income households, and participants of areas with lower population density (p<0.05 in all cases).                                                                                                                                                                                 |                                                                                                                                                                                                                                              |

|                         |                                                                                                                                                                                                                                                                                                                                                                                                                                                                                                                                                                                                                                                                                                                               |                                                                                                                                                                                                                                                                                                                                          |
|-------------------------|-------------------------------------------------------------------------------------------------------------------------------------------------------------------------------------------------------------------------------------------------------------------------------------------------------------------------------------------------------------------------------------------------------------------------------------------------------------------------------------------------------------------------------------------------------------------------------------------------------------------------------------------------------------------------------------------------------------------------------|------------------------------------------------------------------------------------------------------------------------------------------------------------------------------------------------------------------------------------------------------------------------------------------------------------------------------------------|
| (Barry et al., 2021)    | Vaccination uptake was higher among: (a) males (OR=3.48; 95% CI=2.49 to 4.85; p-value<0.001), (b) participants with age >40 years (OR=1.02; 95% CI=1.002 to 1.04; p-value=0.032), (c) native-born participants (OR=1.92; 95% CI=1.36 to 2.69; p-value<0.001), (d) healthcare workers in intensive care unit (OR=1.49; 95% CI=1.08 to 2.06; p-value=0.041), (e) healthcare workers in university hospitals (OR=1.87; 95% CI=1.38 to 2.53; p-value<0.001), and (f) participants that did not use social media as a source of information (OR=4.83; 95% CI=2.82 to 7.57; p-value=0.001).                                                                                                                                         |                                                                                                                                                                                                                                                                                                                                          |
| (Glampson et al., 2021) | Vaccination uptake was lower among black individuals. Negative association between deprivation and vaccination uptake (correlation coefficient=-0.94, p-value<0.01).                                                                                                                                                                                                                                                                                                                                                                                                                                                                                                                                                          |                                                                                                                                                                                                                                                                                                                                          |
| (Malesza & Bozym, 2021) | Vaccination uptake was higher among: (a) participants living with others (OR=3.13; 95% CI=2.03 to 4.26; p-value<0.05), (b) participants having a high rank occupation (OR=1.79; 95% CI=1.33 to 2.15; p-value<0.05), (c) participants being able to access medical services by driving or walking (OR=1.92; 95% CI=1.45 to 2.76; p-value<0.05), (d) participants suffering from a chronic illness (OR=2.98; 95% CI=2.05 to 4.01; p-value<0.05), (e) participants that physicians explained the importance of COVID-19 vaccination (OR=4.23; 95% CI=2.90 to 5.75; p-value<0.05), and (f) participants that physicians explained the possible side effects of COVID-19 vaccination (OR=3.48; 95% CI=2.03 to 4.85; p-value<0.05). | Concerns about the safety of vaccines (91.4%), self-estimated that COVID-19 is not a severe disease (75.4%), concerns about the effectiveness of COVID-19 vaccination (66.7%), experiences of vaccines among family members/friends (57.1%), medical reasons (53%), inconvenience (30.8%), and personal experiences of vaccines (19.2%). |
| (Martin et al., 2021)   | Vaccination uptake was higher among: (a) males (p-value<0.001), (b) older participants (p-value<0.001), (c) white participants (p-value<0.001), (d) allied health professionals and administrative/executive staff (p-value<0.001), and (e) participants without a history of COVID-19 infection (p-value<0.001).                                                                                                                                                                                                                                                                                                                                                                                                             |                                                                                                                                                                                                                                                                                                                                          |



**Identification**

Records identified through PubMed searching (n=417), Medline (n=404), Scopus (n=2269), Web of Science (n=297), ProQuest (n=2196), CINAHL (n=95), and medRxiv (n=685)

**Screening**

Records after duplicates removed (n=2682)

Records screened (n=2682)

Records excluded at first screening (title/abstract) (n=2624)

**Eligibility**

Full-text articles assessed for eligibility (n=58)

Full-text articles excluded, for not meeting inclusion criteria (n=46)

**Included**

Studies included in the qualitative analysis (n=12)

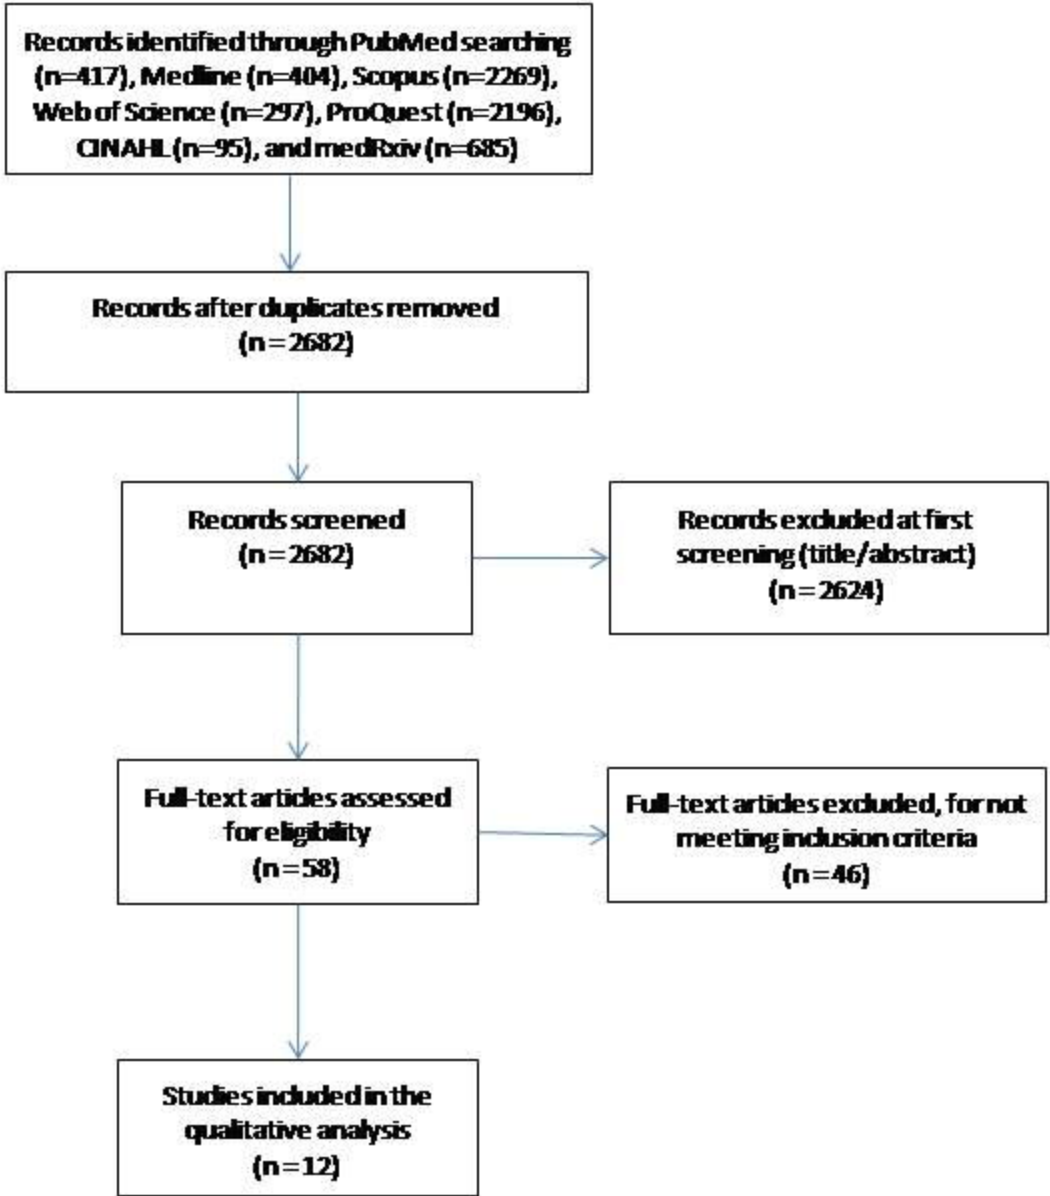

Source: https://medrxiv.org/content/10.1101/2021.07.28.21261261v1.full.pdf
